# Supplementary material for: Synthesis of graphene oxide dots for excitation-wavelength independent photoluminescence at high quantum yields
Source: Royal Society of Chemistry journal article supplement (doi:10.1039/c5tc00492f), 2015-01-01
Supplement: c5tc00492f1.pdf [file c5tc00492f1.pdf]

Electronic Supplementary Information

**Synthesis of Graphene Oxide Dots for Excitation-Wavelength Independent  
Photoluminescence at High Quantum Yields**

Chiao-Yi Teng,<sup>a</sup> Te-Fu Yeh,<sup>a</sup> Kuang-I Lin,<sup>b</sup> Shean-Jen Chen,<sup>b,c</sup> Masahiro Yoshimura,<sup>\*,d</sup> and

Hsisheng Teng<sup>\*,a,b</sup>

<sup>a</sup>Department of Chemical Engineering and Research Center for Energy Technology and Strategy,

National Cheng Kung University, Tainan 70101, Taiwan

<sup>b</sup>Center for Micro/Nano Science and Technology, National Cheng Kung University, Tainan

70101, Taiwan

<sup>c</sup>Department of Engineering Science, National Cheng Kung University, Tainan 70101, Taiwan

<sup>d</sup>Promotion Center of Global Materials Research and Department of Materials Science and

Engineering, National Cheng Kung University, Tainan 70101, Taiwan

\*To whom correspondenec should be addressed. E-mail: [hteng@mail.ncku.edu.tw](mailto:hteng@mail.ncku.edu.tw), Tel: 886-6-2385371, Fax:886-6-2344496

**Electronic Supplementary Information for :**

- (1) the XPS analysis results of uGODs;**
- (2) the PL emission results of uGODs and full-range PL spectra of NGODs;**
- (3) explanation of the Mott-Schottky equation;**
- (4) a summary of PL spectra and the full-range PL spectra of BGODs;**
- (5) the parameter values for PL quantum yield calculation.**

## 1. The XPS analysis results of uGODs

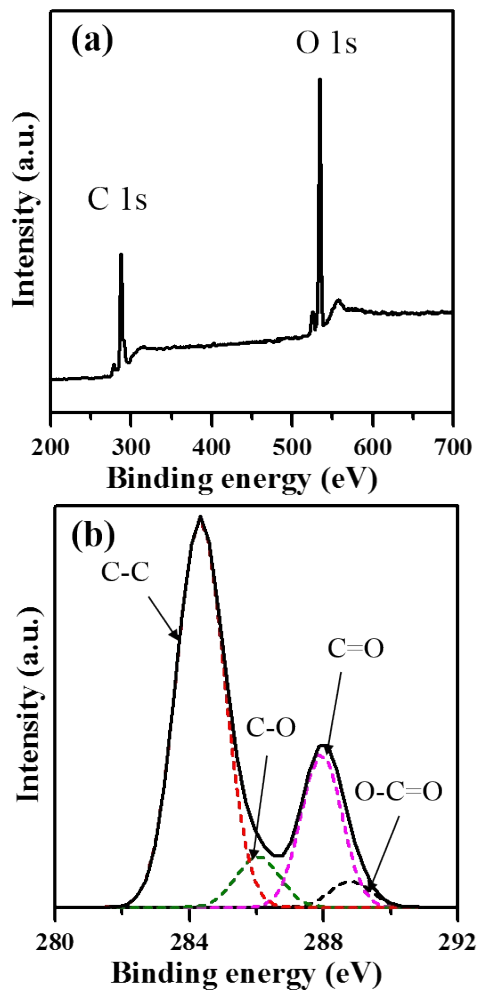

**Fig. S1** XPS spectra of uGODs. (a) Full-range spectrum of uGODs. (b) C 1s spectrum of uGODs. C 1s spectrum was decomposed into several peaks (indicated by the dash lines) that were fitted using a Gaussian function.

## 2. The PL emission results of uGODs and full-range PL spectra of NGODs

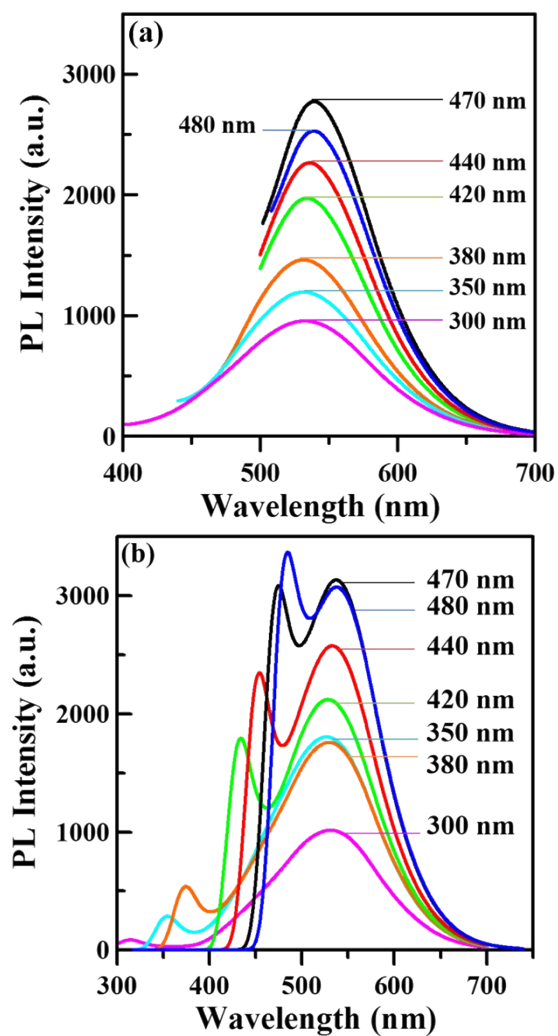

**Fig. S2** (a) PL spectra of uGODs excited by irradiation at various wavelengths. (b) Full-range PL spectra of NGODs excited by irradiation at various wavelengths.

### 3. Explanation of the Mott-Schottky equation

To identify the electronic band characteristics of graphene-based quantum dots, we deposited the QDs on the FTO substrate and determined the conductivity types and Fermi level ( $E_F$ ) potentials of the films using electrochemical impedance spectroscopic analysis along with the Mott-Schottky equation,<sup>1,2</sup> that is

$$\frac{1}{C^2} = \frac{2}{e\epsilon\epsilon_0 N_D} \left( E - E_F - \frac{kT}{e} \right) \quad \text{for n-type conductivity}$$

$$\frac{1}{C^2} = -\frac{2}{e\epsilon\epsilon_0 N_A} \left( -E + E_F + \frac{kT}{e} \right) \quad \text{for p-type conductivity}$$

where  $C$  represents the capacitance of the space-charge region,  $\epsilon_0$  is the vacuum permittivity,  $\epsilon$  is dielectric constant of semiconductors,  $e$  is the electron charge,  $E$  is applied potential,  $E_F$  is the Fermi level potential,  $k$  is the Boltzmann constant,  $T$  is the absolute temperature, and  $N_A$  ( $N_D$ ) is acceptor density (or donor density). The temperature term is generally small and can be neglected. The capacitance values of the space-charge region obtained at various applied potentials. According to the Mott-Schottky equation, a linear relationship of  $1/C^2$  vs.  $E$  can be observed. A negative slope of straight line represents p-type conductivity, which is contrast to n-type conductivity with a positive slope of straight line.

### References

1. J. N. Nian, C. C. Tsai, P. C. Lin and H. Teng, *J. Electrochem. Soc.*, 2009, **156**, H567-H573.
2. I. H. Toor, *J. Electrochem. Soc.*, 2011, **158**, C391-C395.

#### 4. A summary of PL spectra and the full-range PL spectra of BGODs

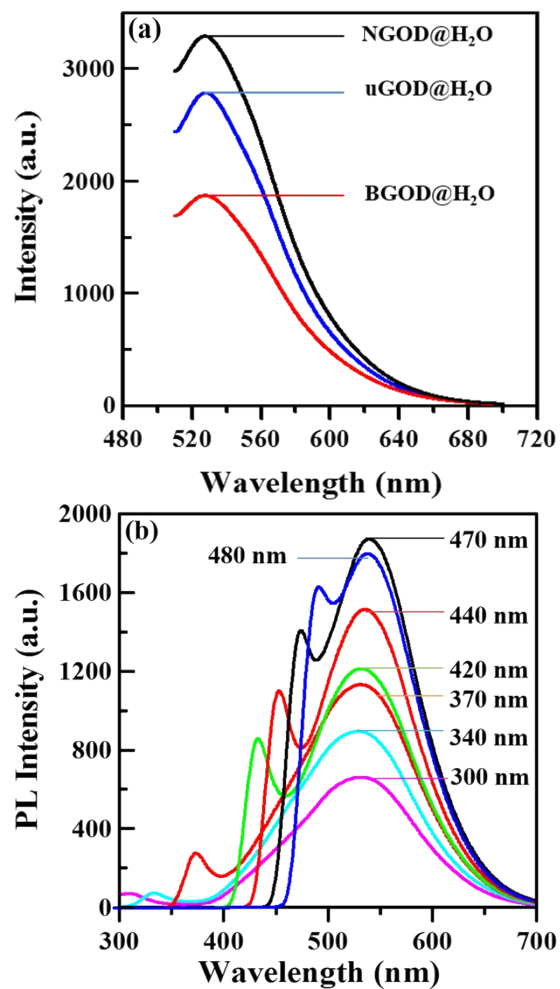

**Fig. S3** (a) PL spectra of the NGOD, uGOD, and BGOD suspensions under irradiation at 470 nm. (b) Full-range PL spectra of BGODs excited by irradiation at various wavelengths.

## 5. The parameter values for PL quantum yield calculation

| Sample                  | Integrated emission intensity ( $I$ ) | Absorption intensity at 470 nm ( $A$ ) | Refractive index of solvents ( $\eta$ ) | Quantum yield ( $QY$ ) |
|-------------------------|---------------------------------------|----------------------------------------|-----------------------------------------|------------------------|
| Fluorecein (in ethanol) | 145781                                | 0.071                                  | 1.36 (ethanol)                          | 0.790                  |
| uGOD (in water)         | 33281                                 | 0.076                                  | 1.33 (water)                            | 0.161                  |
| NGOD (in water)         | 39872                                 | 0.068                                  | 1.33 (water)                            | 0.215                  |
| uGOD-SLP (in water)     | 79435                                 | 0.069                                  | 1.33 (water)                            | 0.423                  |
| NGOD-SLP (in water)     | 87914                                 | 0.065                                  | 1.33 (water)                            | 0.497                  |
